# Supplementary material
Source: Research Square preprint supplement (doi:10.21203/rs.3.rs-8935968/v1)
Supplement: Supplementary file 1 [file bcd8fe78ec49d8f3a3db0b66.docx]

# Supplementary File 1. Complete Search Strategies

Searches were conducted from database inception to 1 November 2025 with no language restrictions.

1. PubMed/MEDLINE

(A) Low back pain concept
("Low Back Pain"[Mesh] OR "low back pain"[tiab] OR "chronic low back pain"[tiab] OR lumbago[tiab] OR "nonspecific low back pain"[tiab])

(B) Electroacupuncture concept
("Electroacupuncture"[Mesh] OR electroacupuncture[tiab] OR "electro-acupuncture"[tiab])

(C) Study design (RCT)
("Randomized Controlled Trial"[Publication Type] OR randomized[tiab] OR randomised[tiab] OR randomly[tiab] OR RCT[tiab] OR trial[tiab])

(D) Final combined strategy
((A) AND (B) AND (C))

2. Scopus

(A) Low back pain concept
TITLE-ABS-KEY("low back pain" OR "chronic low back pain" OR lumbago OR "nonspecific low back pain")

(B) Electroacupuncture concept
TITLE-ABS-KEY(electroacupuncture OR "electro-acupuncture")

(C) Study design (RCT)
TITLE-ABS-KEY("randomized controlled trial" OR "randomised controlled trial" OR randomized OR randomised OR randomly OR RCT OR trial)

(D) Final combined strategy
((A) AND (B) AND (C))

3. Web of Science (Core Collection)

(A) Low back pain concept
TS=("low back pain" OR "chronic low back pain" OR lumbago OR "nonspecific low back pain")

(B) Electroacupuncture concept
TS=(electroacupuncture OR "electro-acupuncture")

(C) Study design (RCT)
TS=("randomized controlled trial" OR "randomised controlled trial" OR randomized OR randomised OR randomly OR RCT OR trial)

(D) Final combined strategy
((A) AND (B) AND (C))
